# Supplementary material for: Seaweed functional strategies, functional groups, and taxon dynamics through a 213-year historical series of Rio De Janeiro Bay
Source: PubMed Central journal article supplement (PMC11522484; doi:10.1038/s41598-024-77284-y), 2024-10-29
Supplement: 41598_2024_77284_MOESM2_ESM.pdf [file 41598_2024_77284_MOESM2_ESM.pdf]

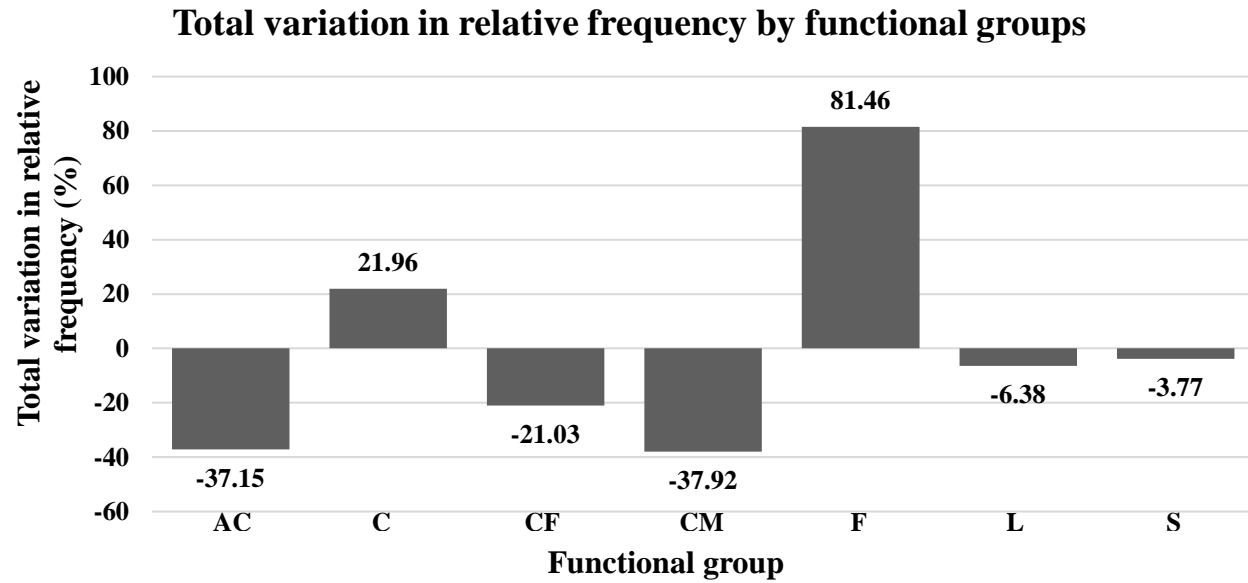

**Supplementary Figure 1.** Total variation in the relative frequency of each seaweed functional group. AC: Articulated Calcareous. C: Crustose. CF: Corticated Foliose. CM: Corticated Macrophyte. F: Filamentous. L: Leathery Macrophyte. S: Sheet (Foliose).
